# Supplementary material
Source: PubMed Central journal article supplement (PMC4589204)
Supplement: NIHMS670986-supplement-Supplementary_Material.pdf [file NIHMS670986-supplement-Supplementary_Material.pdf]

# Web-based Supplementary Materials for “Distribution-free Inference of Zero-inflated Binomial Data for Longitudinal Studies” by

He, H.<sup>a</sup>, Wang, W. J.<sup>a</sup>, Hu, J.<sup>a,b\*</sup>, Gallop, R.<sup>c</sup>,

Crits-Christoph, P.<sup>d</sup> and Xia, Y. L.<sup>a</sup>

<sup>a</sup>*Department of Biostatistics and Computational Biology,  
University of Rochester, Rochester, NY 14642, USA;*

<sup>b</sup>*College of Basic Science and Information Engineering,  
Yunnan Agricultural University,  
Kunming, Yunnan, China, 650201;*

<sup>c</sup>*Department of Mathematics and Applied Statistics,  
West Chester University, West Chester, PA 19383, USA;*

<sup>d</sup>*Department of Psychiatry, University of Pennsylvania,  
Philadelphia, PA 19104, USA*

February 15, 2015

## Web Appendix A: Proof of Lemma 1

Let  $S_i$  and  $D_i$  are defined in (2.5), that is

$$S_i = (s_{1i}, s_{2i})^\top = (I(\mathbf{y}_i = 0) - E[I(\mathbf{y}_i = 0) | \mathbf{x}_i], I(\mathbf{y}_i > 0)(\mathbf{y}_i - E[\mathbf{y}_i | \mathbf{y}_i > 0, \mathbf{x}_i]))^\top,$$

$$D_i = \frac{\partial}{\partial \beta} \mathbf{s}_i = \begin{pmatrix} \frac{\partial}{\partial \beta_u} s_{1i} & \frac{\partial}{\partial \beta_u} s_{2i} \\ \frac{\partial}{\partial \beta_v} s_{1i} & \frac{\partial}{\partial \beta_v} s_{2i} \end{pmatrix}.$$

So we have

$$\frac{\partial s_{1i}}{\partial \beta_u} = -(1 - (1 - p_i)^{m_i}) \frac{\partial \rho_i}{\partial \beta_\mu}, \quad \frac{\partial s_{2i}}{\partial \beta_u} = \mathbf{0},$$

---

\*Corresponding author. Email: hududu@ynau.edu.cn

and

$$\begin{aligned}\frac{\partial s_{1i}}{\partial \beta_\nu} &= (1 - \rho_i) m_i (1 - p_i)^{m_i - 1} \frac{\partial p_i}{\partial \beta_\nu}, \\ \frac{\partial s_{2i}}{\partial \beta_\nu} &= -I(\mathbf{y}_i > 0) \frac{1 - (1 - p_i)^{m_i} - p_i m_i (1 - p_i)^{m_i - 1}}{(1 - (1 - p_i)^{m_i})^2} m_i \frac{\partial p_i}{\partial \beta_\nu}.\end{aligned}$$

By simple algebraic computation, we have

$$\begin{aligned}\text{Var}[s_{1i} | \mathbf{x}_i] &= [\rho_i + (1 - \rho_i) (1 - p_i)^{m_i}] [(1 - \rho_i) (1 - (1 - p_i)^{m_i})], \\ E[s_{2i} | \mathbf{x}_i] &= \Pr(\mathbf{y}_i > 0 | \mathbf{x}_i) E[(\mathbf{y}_i - E[\mathbf{y}_i | \mathbf{y}_i > 0, \mathbf{x}_i]) | \mathbf{y}_i > 0, \mathbf{x}_i] = 0,\end{aligned}$$

and

$$\begin{aligned}\text{Var}(s_{2i} | \mathbf{x}_i) &= E[s_{2i}^2 | \mathbf{x}_i] - (E[s_{2i} | \mathbf{x}_i])^2 \\ &= \Pr(\mathbf{y}_i > 0 | \mathbf{x}_i) (E[[\mathbf{y}_i - E[\mathbf{y}_i | \mathbf{y}_i > 0, \mathbf{x}_i]]^2 | \mathbf{y}_i > 0, \mathbf{x}_i]) \\ &= \Pr(\mathbf{y}_i > 0 | \mathbf{x}_i) (E[\mathbf{y}_i^2 | \mathbf{y}_i > 0, \mathbf{x}_i] - (E[\mathbf{y}_i | \mathbf{y}_i > 0, \mathbf{x}_i])^2) \\ &= (1 - \rho_i) (1 - (1 - p_i)^{m_i}) \left[ \frac{m_i p_i + m_i (m_i - 1) p_i^2}{1 - (1 - p_i)^{m_i}} - \left( \frac{m_i p_i}{1 - (1 - p_i)^{m_i}} \right)^2 \right].\end{aligned}$$

Hence

$$\begin{aligned}\text{Cov}(s_{1i}, s_{2i} | \mathbf{x}_i) &= E[(s_{1i} - E(s_{1i} | \mathbf{x}_i)) (s_{2i} - E(s_{2i} | \mathbf{x}_i)) | \mathbf{x}_i] \\ &= E(I(\mathbf{y}_i = 0) - E[I(\mathbf{y}_i = 0) | \mathbf{x}_i]) E[I(\mathbf{y}_i > 0) (\mathbf{y}_i - E(\mathbf{y}_i | \mathbf{y}_i > 0, \mathbf{x}_i)) | \mathbf{x}_i] \\ &= \Pr(\mathbf{y}_i > 0 | \mathbf{x}_i) E[I(\mathbf{y}_i = 0) - E[I(\mathbf{y}_i = 0) | \mathbf{x}_i]] E[(\mathbf{y}_i - E(\mathbf{y}_i | \mathbf{y}_i > 0, \mathbf{x}_i)) | \mathbf{y}_i > 0, \mathbf{x}_i] \\ &= 0.\end{aligned}$$

## Web Appendix B: Proof of Theorem 1

Based on (2.5), the GEE  $\mathbf{w}_n(\beta) = \frac{1}{n} \sum_{i=1}^n D_i V_i^{-1} S_i$ . Since  $E(D_i V_i^{-1} S_i) = 0$ , the GEE (2.5) is unbiased and the estimate  $\hat{\beta}$ , i.e., the solution to the equations, is also consistent.

By applying a Taylor expansion to (2.5), we have

$$\sqrt{n} \mathbf{w}_n = - \left( \frac{\partial}{\partial \beta} \mathbf{w}_n \right)^\top \sqrt{n} (\hat{\beta} - \beta) + \mathbf{o}_p(1). \quad (1)$$

It follows from (1) that

$$\sqrt{n}(\hat{\beta} - \beta) = \left(-\frac{\partial}{\partial\beta}\mathbf{w}_n\right)^{-\top} \frac{\sqrt{n}}{n} \sum_{i=1}^n \mathbf{w}_{ni} + \mathbf{o}_p(1). \quad (2)$$

Since

$$\frac{\partial}{\partial\beta}\mathbf{w}_n = \frac{1}{n} \sum_{i=1}^n \left(\frac{\partial}{\partial\beta}S_i\right) (D_iV_i^{-1})^T = \frac{1}{n} \sum_{i=1}^n D_i (D_iV_i^{-1})^T + \mathbf{o}_p(1) \rightarrow_p B. \quad (3)$$

where  $\rightarrow_p$  denotes convergence in probability, it follows from (2) and (3) that

$$\sqrt{n}(\hat{\beta} - \beta) = -B^{-\top} \frac{\sqrt{n}}{n} \sum_{i=1}^n \mathbf{w}_{ni} + \mathbf{o}_p(1). \quad (4)$$

By applying the central limit theorem and Slutsky's theorem,  $\hat{\beta}$  is asymptotically normal with the asymptotic variance given by  $\Sigma$  in Theorem 1.

## Web Appendix C: Proof of Theorem 3

Based on (4.3), the weighted GEE  $\mathbf{w}_n(\beta) = \frac{1}{n} \sum_{i=1}^n D_iV_i^{-1}\Delta_iS_i$ . By definition,  $\Delta_i$  is a  $m \times m$  block diagonal matrix with the  $t$ th block diagonal matrix given by  $\frac{r_{it}}{\pi_{it}}\mathbf{I}_2$  ( $1 \leq t \leq m$ ), with  $\mathbf{I}_m$  denoting the  $m \times m$  identify matrix. Since  $E\left(\frac{r_{it}}{\pi_{it}}\mathbf{I}_2 \mid \mathbf{r}_i, \mathbf{y}_i, \mathbf{x}_i\right) = \mathbf{I}_2$ , we have  $E(D_iV_i^{-1}\Delta_iS_i) = E[D_iV_i^{-1}S_iE(\Delta_i \mid \mathbf{r}_i, \mathbf{y}_i, \mathbf{x}_i)]$ . It follows that  $E(D_iV_i^{-1}\Delta_iS_i) = E(D_iV_i^{-1}S_i) = 0$ . Thus, the WGEE (4.6) is unbiased and the estimate  $\hat{\beta}$  obtained as the solution to the equations is consistent.

Let  $\hat{\gamma}$  be the solution to the (4.5). By a Taylor expansion of the estimating equations in (4.5) and solving for  $\hat{\gamma} - \gamma$ , we obtain

$$\sqrt{n}(\hat{\gamma} - \gamma) = -H^{-1} \frac{\sqrt{n}}{n} \sum_{i=1}^n \mathbf{Q}_{ni} + \mathbf{o}_p(1), \quad (5)$$

where  $\mathbf{o}_p(1)$  denotes the stochastic  $\mathbf{o}(1)[1]$  and  $H$  is defined as in Theorem (3). Also, by applying a Taylor series expansion to (4.6), we have

$$\begin{aligned} \sqrt{n}\mathbf{w}_n &= -\left(\frac{\partial}{\partial\beta}\mathbf{w}_n\right)^\top \sqrt{n}(\hat{\beta} - \beta) - \left(\frac{\partial}{\partial\alpha}\mathbf{w}_n\right)^\top \sqrt{n}(\hat{\alpha} - \alpha) - \\ &\quad - \left(\frac{\partial}{\partial\gamma}\mathbf{w}_n\right)^\top \sqrt{n}(\hat{\gamma} - \gamma) + \mathbf{o}_p(1). \end{aligned} \quad (6)$$

If  $\hat{\alpha}$  is  $\sqrt{n}$ -consistent, it follows that

$$\left(\frac{\partial}{\partial \alpha} \mathbf{w}_n(\beta, \alpha)\right)^\top \sqrt{n}(\hat{\alpha} - \alpha) = \mathbf{o}_p(1) \sqrt{n}(\hat{\alpha} - \alpha) = \mathbf{o}_p(1).$$

By substituting  $\mathbf{o}_p(1)$  for  $\left(\frac{\partial}{\partial \alpha} \mathbf{w}_n(\beta, \alpha)\right)^\top \sqrt{n}(\hat{\alpha} - \alpha)$  in (6) and solving for  $\sqrt{n}(\hat{\beta} - \beta)$ , we obtain

$$\sqrt{n}(\hat{\beta} - \beta) = \left(-\frac{\partial}{\partial \beta} \mathbf{w}_n\right)^{-\top} \sqrt{n}[\mathbf{w}_n + C(\hat{\gamma} - \gamma)] + \mathbf{o}_p(1). \quad (7)$$

It follows from (5) and (7) that

$$\sqrt{n}(\hat{\beta} - \beta) = \left(-\frac{\partial}{\partial \beta} \mathbf{w}_n\right)^{-\top} \frac{\sqrt{n}}{n} \sum_{i=1}^n (\mathbf{w}_{ni} - CH^{-1}\mathbf{Q}_{ni}) + \mathbf{o}_p(1). \quad (8)$$

Since

$$\frac{\partial}{\partial \beta} \mathbf{w}_n = \frac{1}{n} \sum_{i=1}^n \left(\frac{\partial}{\partial \beta} \Delta_i S_i\right) (D_i V_i^{-1})^T + \mathbf{o}_p(1) = \frac{1}{n} \sum_{i=1}^n D_i \Delta_i (D_i V_i^{-1})^T + \mathbf{o}_p(1) \rightarrow_p B. \quad (9)$$

where  $\rightarrow_p$  denotes convergence in probability, it follows from (8) and (9) that

$$\sqrt{n}(\hat{\beta} - \beta) = -B^{-\top} \frac{\sqrt{n}}{n} \sum_{i=1}^n (\mathbf{w}_{ni} - CH^{-1}\mathbf{Q}_{ni}) + \mathbf{o}_p(1). \quad (10)$$

By applying the central limit theorem and Slutsky's theorem to (10)[1],  $\hat{\beta}$  is asymptotically normal with the asymptotic variance given by  $\Sigma_\beta$  in Theorem 3.

## Web Appendix D: Derivative of $Corr(y_{i1}, y_{i2} \mid x_i)$

For  $i$ th subject in the at-risk group, the  $Cov(y_{i1}, y_{i2} \mid x_i)$  and  $Var(y_{i1} \mid x_i)$  can be computed as

$$\begin{aligned} Cov(y_{i1}, y_{i2} \mid x_i) &= E(y_{i1}y_{i2} \mid x_i) - E(y_{i1} \mid x_i)E(y_{i2} \mid x_i) \\ &= (1 - \rho_i)(\lambda_i m p_i - \lambda_i m p_i^2 + (m p_i)^2) - [(1 - \rho_i) m p_i]^2 \\ &= (1 - \rho_i) m p_i (\lambda_i - \lambda_i p_i + \rho_i m p_i), \end{aligned}$$

and

$$\begin{aligned} \text{Var}(y_{i1} | x_i) &= E(y_{i1}^2 | x_i) - [E(y_{i1} | x_i)]^2 \\ &= (1 - \rho_i)mp_i(1 - p_i + mp_i) - [(1 - \rho_i)mp_i]^2 \\ &= (1 - \rho_i)mp_i(1 - p_i + m\rho_i p_i), \end{aligned}$$

hence we have

$$\text{corr}(y_{i1}, y_{i2} | x_i) = \frac{\lambda_i - p_i(\lambda_i - m\rho_i)}{1 - p_i(1 - m\rho_i)}.$$

## References

- [1] Jeanne Kowalski, Xin M. Tu. *Modern applied U-statistics*. Wiley Series in Probability and Statistics. Wiley-Interscience, Hoboken, NJ, 2008.
